# Supplementary material
Source: publisher site journal article supplement (https://kjim.org/upload/media/kjim-2024-097-Supplementary-Figure-3.pdf)
Supplement: Supplementary file 1 [file kjim-2024-097-Supplementary-Figure-3.pdf]

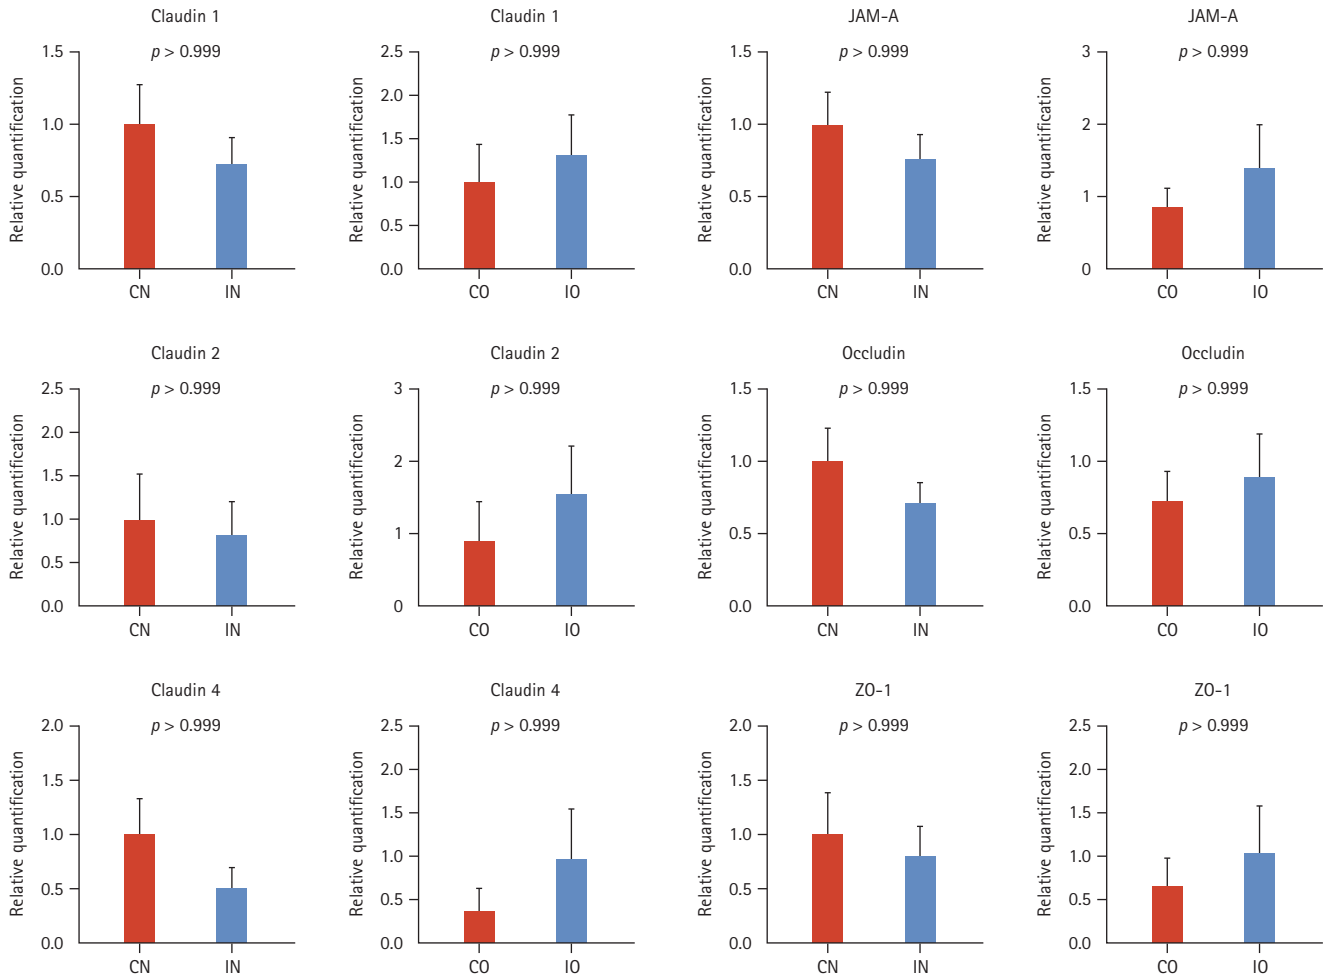

**Supplementary Figure 3.** Claudin-1, -2, -4, JAM-A, occludin, and ZO-1 mRNA expression levels using reverse transcription polymerase chain reaction in the colonic mucosa of the controls and patients with IBS according to body mass index. JAM-A, junctional adhesion molecule; ZO-1, zonula occludens-1; IBS, irritable bowel syndrome; CN, control normal weight (n = 18); IN, IBS normal weight (n = 24); CO, control obesity (n = 6); IO, IBS obesity (n = 4).
